# Supplementary material
Source: PubMed Central journal article supplement (PMC2728948)
Supplement: 0904195106_0904195106SI.pdf [file 0904195106_0904195106SI.pdf]

# Supporting Information

Raff et al. 10.1073/pnas.0904195106

## SI Text

**Reaction of Surface-Adsorbed HONO with HCl.** The flow system described in the text was used to study the adsorption of nitrous acid to fumed SiO<sub>2</sub> and the potential of surface-adsorbed HONO to form ClNO when exposed to gaseous HCl. A stream of nitrogen containing HONO (5–6 ppm) and water vapor [(4.1–4.7) × 10<sup>16</sup> molecules per centimeter] was flowed through a borosilicate glass reaction tube containing a bed of 1.0 g of SiO<sub>2</sub> pellets, or bypassed through an empty tube on its way to the IR cell. As shown in the top part of Fig. S1, HONO is effectively removed when the nitrogen stream is diverted over a bed of SiO<sub>2</sub> (indicated by the shaded regions of the graph). In this experiment, the SiO<sub>2</sub> was exposed to HONO for a total of 1.75 h. The reaction chamber was closed off from the gas stream between  $t = 165$  and  $t = 175$  min. At  $t = 180$  min a stream of HCl (≈200 ppm) and water vapor (6% RH) was flowed through the empty reactor, then diverted through the SiO<sub>2</sub>-filled reactor between  $t = 185$  and  $t = 195$  min. Nitrosyl chloride was not observed in the reactor effluent. A possible explanation for the absence of ClNO in these experiments is that HONO is converted into NO<sub>2</sub> and NO on the SiO<sub>2</sub> surface (1) and then quickly removed by the stream of nitrogen flowing over the SiO<sub>2</sub>. In this case, the concentration of NO<sup>+</sup> on the SiO<sub>2</sub> surface would be insufficient to produce a detectable signal from ClNO. However, the concentration of NO and NO<sub>2</sub> were always below the detection limit of 1 ppm in these experiments. Future work is focused on

understanding the fate of HONO upon adsorption to SiO<sub>2</sub> surfaces.

**Effect of Water on ClNO Hydrolysis.** Previous studies have shown that hydrolysis on aqueous solutions may be a loss process for ClNO in the atmosphere (2, 3). The surprising stability of ClNO in our experiments, even under conditions of high water vapor concentrations and high surface area, warranted further investigation of the kinetics of ClNO loss in our system. Experiments were performed in which ClNO (120–180 ppm) was added to a 10-cm path length IR cell containing 1.0 g of fumed SiO<sub>2</sub> pellets that had been evacuated overnight at ≈10<sup>-4</sup> Torr and heated at 125 °C. After cooling to room temperature, water vapor was introduced to the IR cell from an attached 493-cm<sup>3</sup> bulb to give a gas-phase equilibrium water vapor concentration of (0.7–1) × 10<sup>17</sup> molecules cm<sup>-3</sup> (relative humidity of 9–13%) and the decay of ClNO was monitored by FTIR. Least squares fit of the decay of [ClNO] vs. time to an exponential function yielded a first order rate constant of (0.2–4) × 10<sup>-5</sup> s<sup>-1</sup> depending on the water concentration, indicating that the decay of ClNO due to hydrolysis was negligible under conditions of experiments reported here. Assuming that fumed-SiO<sub>2</sub> is a surrogate for mineral oxide surfaces, this suggests that loss of ClNO to aerosol particles and surfaces at the terrestrial-air interface may be much slower than what is expected to occur in bulk water. This is not surprising because water adsorbed on surfaces is very different chemically and physically from bulk liquid water (4–6).

1. Syomin DA, Finlayson-Pitts BJ (2003) HONO decomposition on borosilicate glass surfaces: Implications for environmental chamber studies and field experiments. *Phys Chem Chem Phys* 5:5236–5242.
2. Karlsson RS, Ljungström EB (1996) Laboratory Study of ClNO: Hydrolysis. *Environ Sci Technol* 30:2008–2013.
3. Scheer V, et al. (1997) Uptake of nitrosyl chloride (NOCl) by aqueous solutions. *J Phys Chem A* 101:9359–9366.
4. Maccarini M (2007) Water at solid surfaces: A review of selected theoretical aspects and experiments on the subject. *Biointerphases* 2:MR1-MR15.
5. Thiel PA, Madey TE (1987) The interaction of water with solid-surfaces—fundamental aspects. *Surf Sci Rep* 7:211–385.
6. Moussa SG, et al. (2009) Experimental and theoretical characterization of adsorbed water on self-assembled monolayers: Understanding the interaction of water with atmospherically relevant surfaces. *J Phys Chem A* 113:2060–2069.
